# Supplementary material
Source: PubMed Central journal article supplement (PMC3103887)

## Supplementary Materials

### Crystal Structure of a Phenol-coupling P450 Monooxygenase Involved in Teicoplanin Biosynthesis

Zhi Li<sup>a</sup>, Sanjeewa G. Rupasinghe<sup>b,c</sup>, Mary A. Schuler<sup>a,b,c</sup>, and Satish K. Nair<sup>a,d,e,\*</sup>

<sup>a</sup>Department of Biochemistry, 600 S. Mathews Avenue, Urbana, IL 61801, USA;

<sup>b</sup>Department of Cell and Developmental Biology; <sup>c</sup>Department of Plant Biology, 1201 W. Gregory Dr., 161 Edward R. Madigan Laboratory, Urbana, IL 61801, USA; <sup>d</sup>Center for Biophysics and Computational Biology; <sup>e</sup>Institute for Genomic Biology, University of Illinois at Urbana-Champaign

**\*Correspondence concerning this manuscript should be sent to:**

Dr. Satish K. Nair

Telephone: (217) 333-0641; Facsimile: (217) 244-5858

Electronic Mail: [snair@uiuc.edu](mailto:snair@uiuc.edu)

**Figure S1.** Stereo diagram showing the superposition of the structures of Orf6\* (light pink and pink), with those of P450nor (light blue and blue) and OxyB (light green and green). The orientation of the same as that in Figure 5A and illustrates that while the overall structures superimpose well, the major deviations are in the positions of the F-G helices.

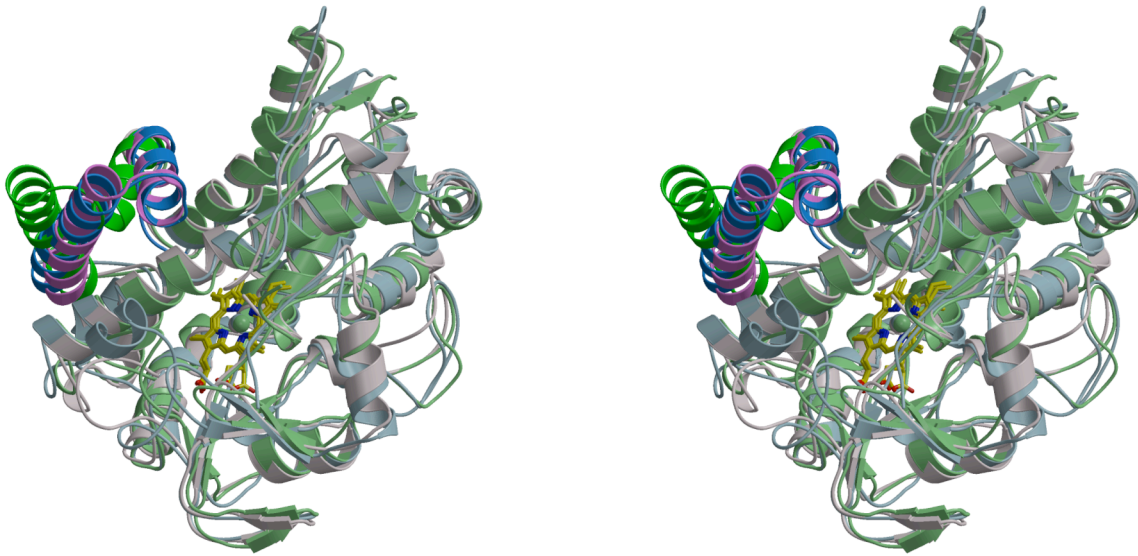

**Figure S2.** Stereo diagram showing the superposition of the structures of Orf6\* (light pink and pink), with those of P450nor (light blue and blue) and OxyB (light green and green). The orientation of the same as that in Figure 5B and illustrates that while the overall structures superimpose well, the major deviations are in the positions of the F-G helices.

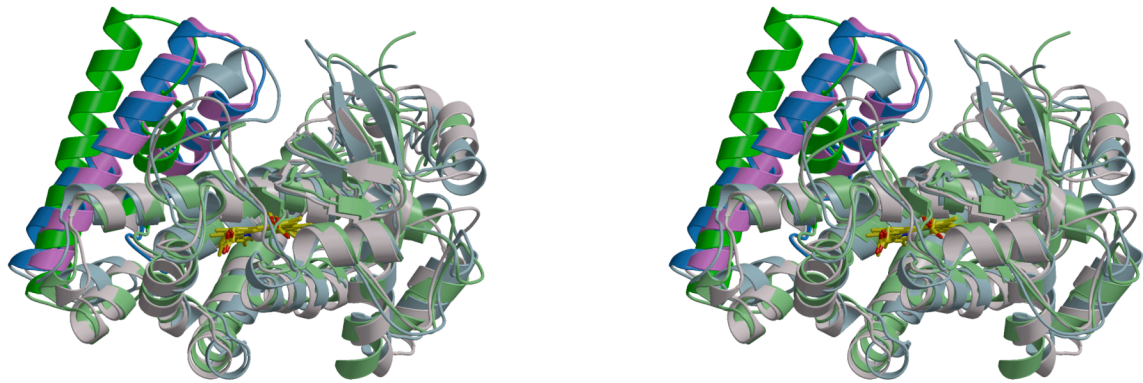

Supplement: NIHMS267686-supplement-Supp_Figure_S1-S2.pdf [file NIHMS267686-supplement-Supp_Figure_S1-S2.pdf]
